# Supplementary material
Source: PubMed Central journal article supplement (PMC5936641)
Supplement: NIHMS957621-supplement-1.pdf [file NIHMS957621-supplement-1.pdf]

## Social Relationships, Inflammation Markers, and Breast Cancer Incidence in the Women's Health Initiative

### The Breast

Evan L. Busch (Channing Division of Network Medicine, Department of Medicine, Brigham and Women's Hospital and Harvard Medical School; nhebu@channing.harvard.edu), Eric A. Whitsel, Candyce H. Kroenke, and Yang C. Yang

Supplemental Table 1. Associations between social relationship characteristics and dichotomous inflammation markers by cohort

| Inflammation<br>Marker Outcome                    | Social Relationship<br>Characteristic                     | Observational Study |      |            | Clinical Trial |      |            |
|---------------------------------------------------|-----------------------------------------------------------|---------------------|------|------------|----------------|------|------------|
|                                                   |                                                           | N                   | OR   | 95% CI     | N              | OR   | 95% CI     |
| C-Reactive Protein<br>(mg/L)                      | Social Network Size <sup>a</sup>                          | 4,183               | 0.91 | 0.85, 0.98 | 8,108          | 0.99 | 0.94, 1.04 |
|                                                   | Social Support <sup>a</sup>                               | 4,085               | 1.00 | 0.98, 1.02 | 8,155          | 0.99 | 0.98, 1.01 |
|                                                   | Social Strain <sup>a</sup>                                | 4,047               | 1.07 | 1.02, 1.12 | 8,088          | 1.02 | 0.98, 1.05 |
|                                                   | Social Support <sup>b</sup><br>Social Strain <sup>b</sup> | 3,914               | 1.01 | 0.99, 1.03 | 7,888          | 0.99 | 0.98, 1.01 |
| White Blood Cell Count<br>(thousands of cells/uL) | Social Network Size <sup>a</sup>                          | 73,231              | 0.79 | 0.75, 0.84 | 43,213         | 0.76 | 0.71, 0.82 |
|                                                   | Social Support <sup>a</sup>                               | 72,295              | 0.97 | 0.95, 0.99 | 45,585         | 0.98 | 0.96, 1.00 |
|                                                   | Social Strain <sup>a</sup>                                | 72,608              | 1.05 | 1.01, 1.09 | 45,607         | 1.08 | 1.03, 1.14 |
|                                                   | Social Support <sup>b</sup><br>Social Strain <sup>b</sup> | 71,114              | 0.97 | 0.96, 0.99 | 44,812         | 0.99 | 0.97, 1.01 |
|                                                   |                                                           |                     | 1.03 | 0.99, 1.07 |                | 1.07 | 1.02, 1.13 |

Dependent variable was C-Reactive Protein ( $\geq 3$  mg/L vs  $< 3$  mg/L) or White Blood Cell Count ( $\geq 10,000$  cells/uL vs  $< 10,000$  cells/uL). Social relationship variable was categorical Social Network Size (0-3), Social Support (0-9), and/or Social Strain (0-4). All models adjusted for age, race/ethnicity, education, age at menarche, age at menopause, parity, amount of time breastfeeding, and hormone therapy use. All variables were measured at baseline.

<sup>a</sup>Only social relationship variable in model.

<sup>b</sup>Model included both Social Support and Social Strain.

**Supplemental Table 2. Associations between social relationship characteristic and continuous inflammation markers by cohort**

| Inflammation<br>Marker Outcome                            | Social Relationship<br>Characteristic                           | Observational Study |               |              |                | Clinical Trial |               |              |              |
|-----------------------------------------------------------|-----------------------------------------------------------------|---------------------|---------------|--------------|----------------|----------------|---------------|--------------|--------------|
|                                                           |                                                                 | N                   | Beta          | SE           | P-value        | N              | Beta          | SE           | P-value      |
| <b>C-Reactive Protein<br/>(mg/L)</b>                      | <b>Social Network Size<sup>a</sup></b>                          | 4,183               | -0.29         | 0.14         | 0.04           | 8,108          | -0.19         | 0.08         | 0.03         |
|                                                           | <b>Social Support<sup>a</sup></b>                               | 4,085               | 0.02          | 0.04         | 0.6            | 8,155          | -0.004        | 0.03         | 0.9          |
|                                                           | <b>Social Strain<sup>a</sup></b>                                | 4,047               | 0.34          | 0.09         | <0.0001        | 8,088          | 0.18          | 0.06         | 0.002        |
|                                                           | <b>Social Support<sup>b</sup><br/>Social Strain<sup>b</sup></b> | 3,914               | 0.07<br>0.40  | 0.04<br>0.10 | 0.1<br><0.0001 | 7,888          | 0.01<br>0.18  | 0.03<br>0.06 | 0.6<br>0.004 |
| <b>White Blood Cell Count<br/>(thousands of cells/uL)</b> | <b>Social Network Size<sup>a</sup></b>                          | 73,231              | -0.23         | 0.05         | <0.0001        | 43,213         | -0.23         | 0.06         | 0.0001       |
|                                                           | <b>Social Support<sup>a</sup></b>                               | 72,295              | -0.03         | 0.02         | 0.05           | 45,585         | -0.02         | 0.02         | 0.2          |
|                                                           | <b>Social Strain<sup>a</sup></b>                                | 72,608              | 0.10          | 0.03         | 0.003          | 45,607         | 0.07          | 0.04         | 0.07         |
|                                                           | <b>Social Support<sup>b</sup><br/>Social Strain<sup>b</sup></b> | 71,114              | -0.02<br>0.08 | 0.02<br>0.03 | 0.2<br>0.02    | 44,812         | -0.01<br>0.06 | 0.02<br>0.04 | 0.4<br>0.1   |

Dependent variable was continuous CRP or WBC. Social relationship variable was categorical Social Network Size (0-3), Social Support (0-9), and/or Social Strain (0-4). All models adjusted for age, race/ethnicity, education, age at menarche, age at menopause, parity, amount of time breastfeeding, and hormone therapy use. All variables were measured at baseline.

<sup>a</sup>Only social relationship variable in model.

<sup>b</sup>Model included both Social Support and Social Strain.

**Supplemental Table 3. Associations between inflammation markers and time from baseline to breast cancer diagnosis by cohort**

| Breast Cancer Outcome | Inflammation Marker           | <u>Observational Study</u> |             |      |            | <u>Clinical Trial</u> |             |      |            |
|-----------------------|-------------------------------|----------------------------|-------------|------|------------|-----------------------|-------------|------|------------|
|                       |                               | N Cases                    | N Non-Cases | HR   | 95% CI     | N Cases               | N Non-Cases | HR   | 95% CI     |
| <b>Invasive</b>       | <b>C-Reactive Protein</b>     | 125                        | 3,653       | 0.84 | 0.58, 1.23 | 269                   | 7,286       | 1.13 | 0.87, 1.46 |
|                       | <b>White Blood Cell Count</b> | 2,707                      | 65,679      | 1.01 | 0.78, 1.31 | 1,621                 | 39,062      | 1.15 | 0.83, 1.59 |
| <b><i>In Situ</i></b> | <b>C-Reactive Protein</b>     | 31                         | 3,631       | 0.83 | 0.40, 1.75 | 69                    | 7,232       | 1.11 | 0.67, 1.85 |
|                       | <b>White Blood Cell Count</b> | 625                        | 65,100      | 1.42 | 0.89, 2.27 | 424                   | 38,694      | 2.03 | 1.23, 3.37 |

Dependent variable was time from baseline to breast cancer diagnosis, censored at 10 years after baseline. Inflammation marker was C-Reactive Protein ( $\geq 3$  mg/L vs  $< 3$  mg/L) or White Blood Cell Count ( $\geq 10,000$  cells/uL vs  $< 10,000$  cells/uL). All models adjusted for age, race/ethnicity, education, age at menarche, age at menopause, parity, amount of time breastfeeding, hormone therapy use, body mass index, smoking, caregiving, negative life events, physical activity, and sleep quality. Models of invasive breast cancer excluded those who developed *in situ* breast cancer, and vice versa. Inflammation markers and confounders were measured at baseline.

**Supplemental Table 4. Associations between social relationship characteristics and time to breast cancer diagnosis, with and without adjustment for inflammation markers, by cohort**

| Breast Cancer Outcome      | Social Relationship Characteristic | Inflammation Marker Mediator | Observational Study |             |        |            | Clinical Trial |             |        |            |            |
|----------------------------|------------------------------------|------------------------------|---------------------|-------------|--------|------------|----------------|-------------|--------|------------|------------|
|                            |                                    |                              | N Cases             | N Non-Cases | HR     | 95% CI     | N Cases        | N Non-Cases | HR     | 95% CI     |            |
| <b>Invasive</b>            | <b>Social Support</b>              | <b>None</b>                  | 2,712               | 65,410      | 1.01   | 0.99, 1.02 | 1,606          | 38,397      | 1.00   | 0.98, 1.01 |            |
|                            |                                    | <b>CRP</b>                   | 123                 | 3,532       | 0.96   | 0.91, 1.02 | 265            | 7,103       | 0.99   | 0.95, 1.04 |            |
|                            |                                    | <b>WBC</b>                   | 2,660               | 64,354      | 1.00   | 0.99, 1.02 | 1,606          | 38,367      | 1.00   | 0.98, 1.01 |            |
|                            | <b>Social Strain</b>               | <b>None</b>                  | 2,731               | 65,700      | 0.99   | 0.96, 1.02 | 1,589          | 38,436      | 0.99   | 0.95, 1.03 |            |
|                            |                                    | <b>CRP</b>                   | 122                 | 3,502       | 1.01   | 0.88, 1.15 | 257            | 7,051       | 1.06   | 0.96, 1.16 |            |
|                            |                                    | <b>WBC</b>                   | 2,676               | 64,643      | 0.99   | 0.96, 1.02 | 1,589          | 38,406      | 0.99   | 0.95, 1.03 |            |
|                            | <b>Social Network Size</b>         | <b>None</b>                  | 2,748               | 66,400      | 0.98   | 0.93, 1.02 | 1,610          | 38,789      | 1.02   | 0.97, 1.08 |            |
|                            |                                    | <b>CRP</b>                   | 123                 | 3,623       | 0.93   | 0.76, 1.14 | 268            | 7,216       | 1.06   | 0.93, 1.21 |            |
|                            |                                    | <b>WBC</b>                   | 2,693               | 65,333      | 0.97   | 0.93, 1.02 | 1,610          | 38,759      | 1.02   | 0.97, 1.08 |            |
|                            | <b><i>In Situ</i></b>              | <b>Social Support</b>        | <b>None</b>         | 625         | 64,837 | 1.03       | 1.00, 1.06     | 413         | 38,032 | 1.02       | 0.99, 1.06 |
|                            |                                    |                              | <b>CRP</b>          | 30          | 3,511  | 0.96       | 0.85, 1.08     | 68          | 7,051  | 1.03       | 0.95, 1.13 |
|                            |                                    |                              | <b>WBC</b>          | 614         | 63,785 | 1.03       | 1.00, 1.06     | 412         | 38,002 | 1.02       | 0.99, 1.06 |
| <b>Social Strain</b>       |                                    | <b>None</b>                  | 628                 | 65,121      | 0.94   | 0.88, 1.00 | 419            | 38,069      | 0.98   | 0.91, 1.06 |            |
|                            |                                    | <b>CRP</b>                   | 30                  | 3,482       | 0.85   | 0.64, 1.11 | 67             | 6,997       | 1.04   | 0.86, 1.25 |            |
|                            |                                    | <b>WBC</b>                   | 617                 | 64,068      | 0.93   | 0.87, 1.00 | 418            | 38,039      | 0.98   | 0.91, 1.06 |            |
| <b>Social Network Size</b> |                                    | <b>None</b>                  | 633                 | 65,819      | 1.03   | 0.94, 1.13 | 424            | 38,421      | 1.11   | 0.99, 1.24 |            |
|                            |                                    | <b>CRP</b>                   | 31                  | 3,601       | 0.69   | 0.45, 1.04 | 68             | 7,163       | 1.26   | 0.96, 1.65 |            |
|                            |                                    | <b>WBC</b>                   | 622                 | 64,756      | 1.03   | 0.94, 1.13 | 423            | 38,391      | 1.11   | 1.00, 1.24 |            |

Dependent variable was time from baseline to breast cancer diagnosis, censored at 10 years after baseline. Social relationship variable was categorical Social Network Size (0-3), Social Support (0-9), or Social Strain (0-4). All models adjusted for age, race/ethnicity, education, age at menarche, age at menopause, parity, amount of time breastfeeding, hormone therapy use, body mass index, smoking, caregiving, negative life events, physical activity, and sleep quality. Models further adjusted for inflammation marker included CRP ( $\geq 3$  mg/L vs  $< 3$  mg/L) or WBC ( $\geq 10,000$  cells/uL vs  $< 10,000$  cells/uL). Models of invasive breast cancer excluded those who developed *in situ* breast cancer, and vice versa. Social relationship characteristics, inflammation markers, and confounders were measured at baseline.

CRP=C-Reactive Protein, WBC=White Blood Cell Count
